# Supplementary material for: Clinical characteristics and prognostic factors for Crohn’s disease relapses using natural language processing and machine learning: a pilot study
Source: PubMed Central journal article supplement — Eur J Gastroenterol Hepatol. 2021 Dec 2;34(4):389–97. doi: 10.1097/MEG.0000000000002317 (PMC8876385; doi:10.1097/meg.0000000000002317), 2021-12-02
Supplement: ejgh-34-389-s001.pdf [file ejgh-34-389-s001.pdf]

**IDENTIFICATION OF PROGNOSTIC FACTORS IN CROHN'S DISEASE USING  
NATURAL LANGUAGE PROCESSING AND MACHINE LEARNING – A PILOT STUDY**

**SUPPLEMENTAL FIGURES AND TABLES**

## Supplemental Figures

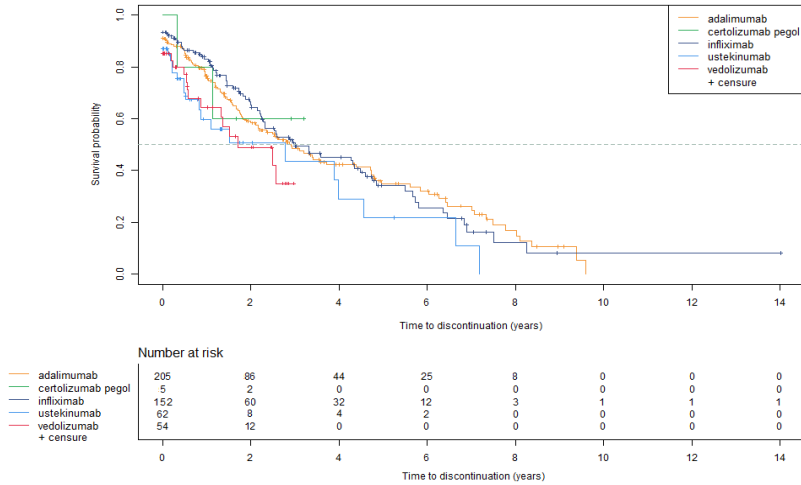

**Figure S1. Time to treatment discontinuation for each biologic agent.** Survival plot (Kaplan-Meier estimator) indicating the survival probability for each biologic across time in years (top) and corresponding data (bottom). Time to discontinuation was evaluated among those subjects that were treated with biologic agents during the last year of the study period. Because the Index Date (time of diagnosis) could be prior to the onset of the study period, time to discontinuation can exceed the length of the study window.

Formatted: Centered

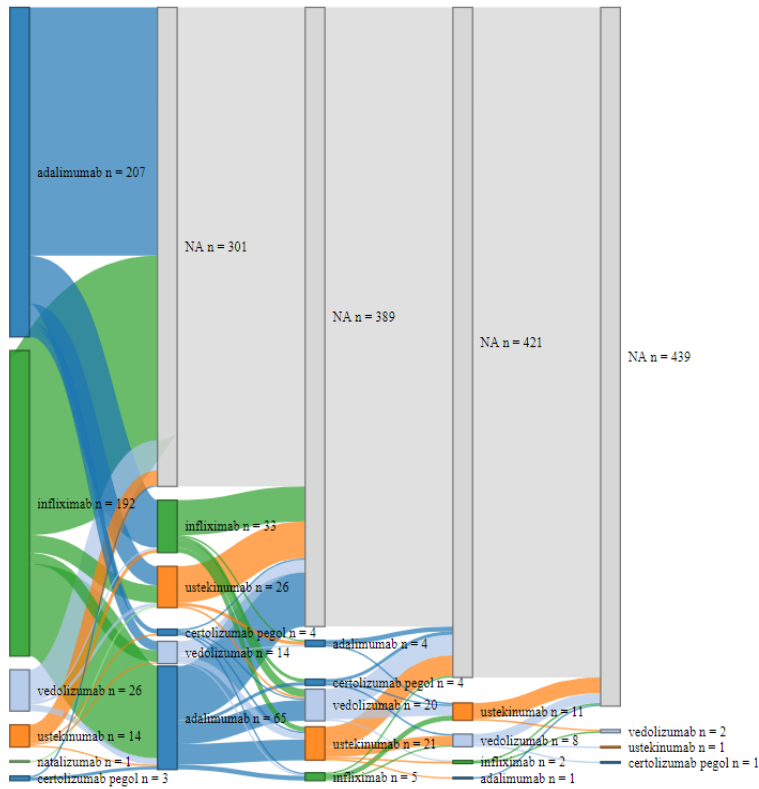

**Figure S2. Patients assigned to different treatment lines with biologics.** Sankey plot depicting the flow of patients by treatment line during the last year of the study period. Each horizontal bar represents a transition across treatment lines (L1-5, from left to right). The link between nodes represents the number of patients that switched from one treatment to another and is represented with arcs that have a width proportional to the patient switch fraction. The grey areas represent the number of patients from whom we do not have information regarding the subsequent treatment lines. NA = not available, representing either patients who a) continued treatment with the same biologic until end of the study period, b) discontinued the treatment and did not receive any other biologic, or c) information regarding biologic treatment was not available in the EHRs.

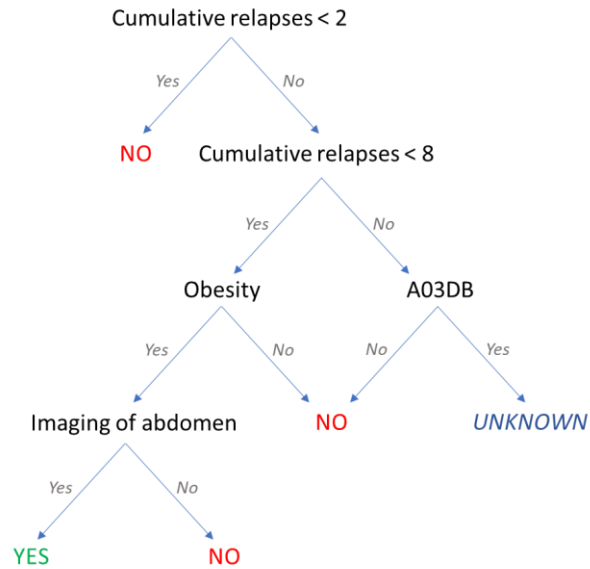

**Figure S3. Decision tree of relevant clinical variables to predict CD relapse at 3 months.** The combination of number of cumulative relapses, obesity, imaging of abdomen and ATC code A03DB (belladonna and derivatives in combination with analgesics) yields a pathway that predicts whether a patient could have a CD relapse (yes, green or blue, unknown) or not (no, red). Patients with less than 2 cumulative relapses, or those with less than 8 but that are not obese, are predicted not to incur in a further relapse. On the other hand, patients with more than 8 cumulative relapses who are obese and have had an imaging test of abdomen were predicted to suffer from a further relapse at the 3-month timepoint. Regarding the use of belladonna and derivatives, patients with more than 8 cumulative relapses who had taken these substances appeared in the decision tree predictive variables, though with an unknown outcome of relapse occurrence.

## Supplemental Tables

**TABLE S1. Number of variables per variable category included in the predictive model for CD-related flare-ups.**

| Category                                                                                 | Number of variables |
|------------------------------------------------------------------------------------------|---------------------|
| Medical History                                                                          | 11515               |
| Surgical procedures                                                                      | 3885                |
| Signs and Symptoms findings                                                              | 3580                |
| Evaluation Procedures                                                                    | 2570                |
| Concomitant Medication                                                                   | 1745                |
| Evaluation Findings                                                                      | 485                 |
| Diagnostic procedures                                                                    | 390                 |
| Biopsy Findings                                                                          | 375                 |
| Family History                                                                           | 321                 |
| Hospital Exposure medication (Study treatments) & Exposure medication (Study treatments) | 105                 |
| Disease Characteristics                                                                  | 105                 |
| Disposition Events (comorbidities, surgery/ procedures, signs, and symptoms)             | 75                  |
| Disposition Events (flare-up, EIMs, complications)                                       | 33                  |
| Substance use (habits)                                                                   | 15                  |
| Laboratory                                                                               | 15                  |
| Procedures History                                                                       | 10                  |
| Demographics                                                                             | 3                   |

**TABLE S2. Relative importance of the most relevant variables included in the predictive model for CD-related flare-ups ([full list](#)).**

| Variable                                                         | Relative importance |
|------------------------------------------------------------------|---------------------|
| Accumulative past flare                                          | 0.358901            |
| AGE                                                              | 0.029441            |
| Difference between event value and basal value Leukocytes        | 0.023361            |
| Difference between event value and basal value Hemoglobin        | 0.010256            |
| Increment respect to maximum normal value Fibrinogen             | 0.009158            |
| Disposition events- past admissions                              | 0.008597            |
| Montreal Scale                                                   | 0.008082            |
| Proton pump inhibitors -A02BC                                    | 0.007368            |
| Substance use Findings (habits) -TOBACCO USE                     | 0.006733            |
| Acetic acid derivatives and related substances -M01AB            | 0.006705            |
| Belladonna and derivatives in combination with analgesics -A03DB | 0.006624            |
| Evaluation Procedures -CT of chest and abdomen                   | 0.005912            |
| methylprednisolone -H02AB04                                      | 0.005684            |
| ciprofloxacin -J01MA02                                           | 0.005551            |
| prednisone -H02AB07                                              | 0.005274            |
| Evaluation Procedures -Source specific culture                   | 0.004973            |
| Diagnostic procedures -Laboratory procedure                      | 0.004925            |
| Medical History -Infection due to Enterobacteriaceae             | 0.004657            |
| Difference between event value and basal value CRP -48           | 0.004641            |
| SEX                                                              | 0.004507            |
| mesalazine -A07EC02                                              | 0.004463            |
| Increment respect to maximum normal value Leukocytes -9          | 0.004463            |
| Evaluation Procedures -Imaging of abdomen                        | 0.004428            |
| Increment respect to maximum normal value CRP -48                | 0.004324            |
| Evaluation Procedures -Blood gas measurement                     | 0.004311            |
| Signs and Symptoms findings -Gastrointestinal tract finding      | 0.004250            |
| metronidazole -J01XD01                                           | 0.004230            |
| Bisphosphonates -M05BA                                           | 0.004085            |
| Medical History -Obesity                                         | 0.003902            |

|                                                                                |          |
|--------------------------------------------------------------------------------|----------|
| Combinations and complexes of aluminum, calcium and magnesium compounds -A02AD | 0.003743 |
| infliximab -L04AB02                                                            | 0.003694 |
| Medical History -Lymphadenopathy                                               | 0.003680 |
| Signs and Symptoms findings -Fatigue                                           | 0.003607 |
| Diagnostic procedures -Bacterial disease screening                             | 0.003504 |
| Evaluation Procedures -Inspection                                              | 0.003432 |
| Difference between event value and basal value Fibrinogen -71                  | 0.003414 |
| Descent respect to minimum normal value Hemoglobin -1                          | 0.003410 |
| Benzodiazepine derivatives -N05BA                                              | 0.003272 |
| Anilides -N02BE                                                                | 0.003251 |
| Disease characteristics -Crohn's disease of ileum                              | 0.003230 |
| azathioprine -L04AX01                                                          | 0.003028 |
| Signs and Symptoms findings -Altered bowel function                            | 0.003003 |
| Disease characteristics -L2                                                    | 0.002998 |
| Diphenylmethane derivatives -N05BB                                             | 0.002955 |
| Signs and Symptoms findings -Mucosal finding                                   | 0.002950 |
| Evaluation Findings -Assessment scales                                         | 0.002948 |
| Biopsy Findings -Biopsy                                                        | 0.002945 |
| Medical History -Ileitis                                                       | 0.002888 |
| Descent respect to minimum normal value Leukocytes -9                          | 0.002874 |
| Medical History -Disorder of coronary artery                                   | 0.002867 |
| Evaluation Procedures -Glucose measurement, body fluid                         | 0.002794 |
| Signs and Symptoms findings -Erythema                                          | 0.002772 |
| Immunoglobulins, normal human -J06BA                                           | 0.002755 |
| Signs and Symptoms findings -Pain in limb                                      | 0.002752 |
| Glucocorticoids -H02AB                                                         | 0.002722 |
| Signs and Symptoms findings -Platelet production finding                       | 0.002722 |
| Surgical procedures -Partial excision of large intestine                       | 0.002718 |
| Bile acid sequestrants -C10AC                                                  | 0.002696 |
| Evaluation Procedures -Body fluid analysis                                     | 0.002688 |
| Diagnostic procedures -Exploration of digestive system                         | 0.002670 |
| Combinations of penicillins, incl. beta-lactamase inhibitors -J01CR            | 0.002663 |
| Electrolyte solutions -B05XA                                                   | 0.002618 |

|                                                              |          |
|--------------------------------------------------------------|----------|
| Procedures History -Other                                    | 0.002576 |
| Opioids in combination with non-opioid analgesics -N02AJ     | 0.002550 |
| Signs and Symptoms findings -Finding of quantity of appetite | 0.002541 |
| Medical History -Structural disorder of heart                | 0.002501 |
| Medical History -Colitis                                     | 0.002489 |
| Medical History -Disorder of spleen                          | 0.002472 |
| Surgical procedures -Operation on prepuce                    | 0.002453 |
| Evaluation Procedures -Red blood cell indices determination  | 0.002447 |
| Procedures History -Therapeutic procedure                    | 0.002444 |
| Medical History -Disorder of abdomen                         | 0.002437 |
| Medical History -Disorder of colon                           | 0.002428 |
| Propionic acid derivatives -M01AE                            | 0.002425 |
| Medical History -Disorder of pancreas                        | 0.002417 |
| Signs and Symptoms findings -Chest wall pain                 | 0.002402 |
| Progestogens and estrogens, fixed combinations -G03AA        | 0.002400 |
| Evaluation Procedures -Complete blood count                  | 0.002343 |
| Surgical procedures -Partial colectomy with anastomosis      | 0.002340 |
| Beta blocking agents, selective, and other diuretics -C07CB  | 0.002326 |
| Evaluation Procedures -In-vitro immunologic test             | 0.002314 |
| Evaluation Procedures -Endoscopy of large intestine          | 0.002305 |
| Disease characteristics -Stricture Crohn's disease           | 0.002261 |
| ACE inhibitors, plain -C09AA                                 | 0.002259 |
| budesonide -A07EA06                                          | 0.002235 |
| Medical History -Inflammation of large intestine             | 0.002235 |
| Medical History -Respiratory tract infection                 | 0.002235 |
| Other drugs for functional gastrointestinal disorders -A03AX | 0.002217 |
| Detoxifying agents for antineoplastic treatment -V03AF       | 0.002198 |
| Substance use Findings (habits) -ALCOHOL USE                 | 0.002184 |
| Substituted alkylamines -R06AB                               | 0.002169 |
| H2-receptor antagonists -A02BA                               | 0.002165 |
| Evaluation Procedures -Antibody measurement                  | 0.002158 |
| Substance use Findings (habits) -OTHER SUBSTANCES            | 0.002127 |
| Esters of aminobenzoic acid -N01BA                           | 0.002125 |



|                                                                         |          |
|-------------------------------------------------------------------------|----------|
| Medical History -Disorder of lower gastrointestinal tract               | 0.002081 |
| Third-generation cephalosporins -J01DD                                  | 0.002077 |
| Insulins and analogues for injection, long-acting -A10AE                | 0.002053 |
| Bulk-forming laxatives -A06AC                                           | 0.002052 |
| Medical History -Disorder due to infection                              | 0.002038 |
| Selective beta-2-adrenoreceptor agonists -R03CC                         | 0.002012 |
| Medical History -Injury of pancreas                                     | 0.002000 |
| Iron bivalent, oral preparations -B03AA                                 | 0.001994 |
| Signs and Symptoms findings -Pain / sensation finding                   | 0.001959 |
| Evaluation Procedures -Imaging                                          | 0.001946 |
| Evaluation Procedures -Ultrasonography of abdomen                       | 0.001941 |
| Signs and Symptoms findings -Abdominal pain                             | 0.001920 |
| Surgical procedures -Scraping                                           | 0.001870 |
| Belladonna alkaloids, tertiary amines -A03BA                            | 0.001862 |
| Evaluation Procedures -Evaluation procedure                             | 0.001858 |
| Evaluation Procedures -Protein electrophoresis                          | 0.001818 |
| Biopsy Findings -Biopsy of large intestine                              | 0.001800 |
| Evaluation Procedures -Soft tissue X-ray of abdomen                     | 0.001796 |
| Other immunosuppressants -L04AX                                         | 0.001790 |
| Combinations of sulfonamides and trimethoprim, incl. derivatives -J01EE | 0.001743 |
| Evaluation Procedures -Delayed hypersensitivity skin test for t...      | 0.001730 |
| Medical History -Intestinal infectious disease                          | 0.001677 |
| Other antiinflammatory and antirheumatic agents, non-steroids -M01AX    | 0.001674 |
| Biopsy Findings -Removal                                                | 0.001670 |
| Softeners, emollients -A06AA                                            | 0.001667 |
| Evaluation Procedures -Electrophoresis measurement                      | 0.001658 |
| Evaluation Procedures -Urinary endoscopy                                | 0.001646 |
| Beta blocking agents, non-selective -C07AA                              | 0.001643 |
| Fluoroquinolones -S01AE                                                 | 0.001624 |
| Selective estrogen receptor modulators -G03XC                           | 0.001616 |
| Evaluation Procedures -Radiographic procedure of chest                  | 0.001614 |
| Evaluation Procedures -CT of bone                                       | 0.001613 |
| Evaluation Procedures -Imaging of head                                  | 0.001606 |

|                                                                    |          |
|--------------------------------------------------------------------|----------|
| Beta blocking agents, selective -C07AB                             | 0.001587 |
| Signs and Symptoms findings -Pain in male genitalia                | 0.001585 |
| Disease characteristics -B1                                        | 0.001566 |
| adalimumab -L04AB04                                                | 0.001564 |
| Evaluation Procedures -Endoscopy of intestine                      | 0.001548 |
| Medical History -Diverticular disease of large intestine           | 0.001546 |
| Heparin group -B01AB                                               | 0.001537 |
| Signs and Symptoms findings -Cramp                                 | 0.001533 |
| Signs and Symptoms findings -Joint pain                            | 0.001532 |
| sulfasalazine -A07EC01                                             | 0.001525 |
| Other antibacterials -J01XX                                        | 0.001520 |
| Signs and Symptoms findings -Incontinence                          | 0.001471 |
| Evaluation Procedures -Diagnostic radiography, posteroanterior ... | 0.001451 |
| Medical History -Gastroenteritis                                   | 0.001441 |
| Surgical procedures -Ileorectostomy                                | 0.001422 |
| Family History -Crohn's disease of small intestine                 | 0.001406 |
| Evaluation Procedures -Laboratory test                             | 0.001383 |
| Signs and Symptoms findings -Nausea and vomiting                   | 0.001367 |
| Evaluation Procedures -Heart procedure                             | 0.001361 |
| Corticosteroids, potent, combinations with antibiotics -D07CC      | 0.001357 |
| Medical History -Myositis                                          | 0.001351 |
| Imidazole and triazole derivatives -D01AC                          | 0.001346 |

---
